# Supplementary material for: European population trends and current conservation status of an endangered steppe-bird species: the Dupont’s lark Chersophilus duponti
Source: PeerJ. 2018 Sep 19;6:e5627. doi: 10.7717/peerj.5627 (PMC6151120; doi:10.7717/peerj.5627)
Supplement: Supplemental Information 1 — The population size per year (from 2004 to 2015) and per Dupont’s lark population (92 populations) is shown. Number -1 indicates the absence of data for a specific year. [file peerj-06-5627-s001.xlsx]

## Sheet: Hoja1
Autonomous_Community	Province	Population	ID	YEAR	POPULATION_SIZE
Castile-La Mancha	Albacete	Cordovilla	1	2004	-1
Castile-La Mancha	Albacete	Cordovilla	1	2005	0
Castile-La Mancha	Albacete	Cordovilla	1	2006	-1
Castile-La Mancha	Albacete	Cordovilla	1	2007	-1
Castile-La Mancha	Albacete	Cordovilla	1	2008	-1
Castile-La Mancha	Albacete	Cordovilla	1	2009	0
Castile-La Mancha	Albacete	Cordovilla	1	2010	-1
Castile-La Mancha	Albacete	Cordovilla	1	2011	-1
Castile-La Mancha	Albacete	Cordovilla	1	2012	3
Castile-La Mancha	Albacete	Cordovilla	1	2013	-1
Castile-La Mancha	Albacete	Cordovilla	1	2014	-1
Castile-La Mancha	Albacete	Cordovilla	1	2015	-1
Castile-La Mancha	Albacete	El Bonillo-El Ballestero	2	2004	-1
Castile-La Mancha	Albacete	El Bonillo-El Ballestero	2	2005	1
Castile-La Mancha	Albacete	El Bonillo-El Ballestero	2	2006	-1
Castile-La Mancha	Albacete	El Bonillo-El Ballestero	2	2007	-1
Castile-La Mancha	Albacete	El Bonillo-El Ballestero	2	2008	-1
Castile-La Mancha	Albacete	El Bonillo-El Ballestero	2	2009	18
Castile-La Mancha	Albacete	El Bonillo-El Ballestero	2	2010	-1
Castile-La Mancha	Albacete	El Bonillo-El Ballestero	2	2011	-1
Castile-La Mancha	Albacete	El Bonillo-El Ballestero	2	2012	-1
Castile-La Mancha	Albacete	El Bonillo-El Ballestero	2	2013	-1
Castile-La Mancha	Albacete	El Bonillo-El Ballestero	2	2014	-1
Castile-La Mancha	Albacete	El Bonillo-El Ballestero	2	2015	-1
Castile-La Mancha	Albacete	Hoya Gonzalo	3	2004	-1
Castile-La Mancha	Albacete	Hoya Gonzalo	3	2005	6
Castile-La Mancha	Albacete	Hoya Gonzalo	3	2006	-1
Castile-La Mancha	Albacete	Hoya Gonzalo	3	2007	-1
Castile-La Mancha	Albacete	Hoya Gonzalo	3	2008	3
Castile-La Mancha	Albacete	Hoya Gonzalo	3	2009	1
Castile-La Mancha	Albacete	Hoya Gonzalo	3	2010	-1
Castile-La Mancha	Albacete	Hoya Gonzalo	3	2011	-1
Castile-La Mancha	Albacete	Hoya Gonzalo	3	2012	-1
Castile-La Mancha	Albacete	Hoya Gonzalo	3	2013	-1
Castile-La Mancha	Albacete	Hoya Gonzalo	3	2014	-1
Castile-La Mancha	Albacete	Hoya Gonzalo	3	2015	-1
Castile-La Mancha	Albacete	Viveros	4	2004	-1
Castile-La Mancha	Albacete	Viveros	4	2005	1
Castile-La Mancha	Albacete	Viveros	4	2006	1
Castile-La Mancha	Albacete	Viveros	4	2007	0
Castile-La Mancha	Albacete	Viveros	4	2008	0
Castile-La Mancha	Albacete	Viveros	4	2009	-1
Castile-La Mancha	Albacete	Viveros	4	2010	-1
Castile-La Mancha	Albacete	Viveros	4	2011	-1
Castile-La Mancha	Albacete	Viveros	4	2012	-1
Castile-La Mancha	Albacete	Viveros	4	2013	-1
Castile-La Mancha	Albacete	Viveros	4	2014	-1
Castile-La Mancha	Albacete	Viveros	4	2015	-1
Andalusia	Almería	Cabo de Gata-Nijar-Las Amoladeras	5	2004	6
Andalusia	Almería	Cabo de Gata-Nijar-Las Amoladeras	5	2005	6
Andalusia	Almería	Cabo de Gata-Nijar-Las Amoladeras	5	2006	4
Andalusia	Almería	Cabo de Gata-Nijar-Las Amoladeras	5	2007	3
Andalusia	Almería	Cabo de Gata-Nijar-Las Amoladeras	5	2008	2
Andalusia	Almería	Cabo de Gata-Nijar-Las Amoladeras	5	2009	9
Andalusia	Almería	Cabo de Gata-Nijar-Las Amoladeras	5	2010	7
Andalusia	Almería	Cabo de Gata-Nijar-Las Amoladeras	5	2011	5
Andalusia	Almería	Cabo de Gata-Nijar-Las Amoladeras	5	2012	11
Andalusia	Almería	Cabo de Gata-Nijar-Las Amoladeras	5	2013	-1
Andalusia	Almería	Cabo de Gata-Nijar-Las Amoladeras	5	2014	-1
Andalusia	Almería	Cabo de Gata-Nijar-Las Amoladeras	5	2015	12
Andalusia	Almería	Filabres-Baza-Cerro Villegas	6	2004	-1
Andalusia	Almería	Filabres-Baza-Cerro Villegas	6	2005	-1
Andalusia	Almería	Filabres-Baza-Cerro Villegas	6	2006	-1
Andalusia	Almería	Filabres-Baza-Cerro Villegas	6	2007	-1
Andalusia	Almería	Filabres-Baza-Cerro Villegas	6	2008	-1
Andalusia	Almería	Filabres-Baza-Cerro Villegas	6	2009	1
Andalusia	Almería	Filabres-Baza-Cerro Villegas	6	2010	1
Andalusia	Almería	Filabres-Baza-Cerro Villegas	6	2011	0
Andalusia	Almería	Filabres-Baza-Cerro Villegas	6	2012	0
Andalusia	Almería	Filabres-Baza-Cerro Villegas	6	2013	0
Andalusia	Almería	Filabres-Baza-Cerro Villegas	6	2014	0
Andalusia	Almería	Filabres-Baza-Cerro Villegas	6	2015	0
Andalusia	Almería	Sierra de Gador-La Campita	7	2004	5
Andalusia	Almería	Sierra de Gador-La Campita	7	2005	-1
Andalusia	Almería	Sierra de Gador-La Campita	7	2006	-1
Andalusia	Almería	Sierra de Gador-La Campita	7	2007	-1
Andalusia	Almería	Sierra de Gador-La Campita	7	2008	1
Andalusia	Almería	Sierra de Gador-La Campita	7	2009	1
Andalusia	Almería	Sierra de Gador-La Campita	7	2010	2
Andalusia	Almería	Sierra de Gador-La Campita	7	2011	1
Andalusia	Almería	Sierra de Gador-La Campita	7	2012	0
Andalusia	Almería	Sierra de Gador-La Campita	7	2013	-1
Andalusia	Almería	Sierra de Gador-La Campita	7	2014	-1
Andalusia	Almería	Sierra de Gador-La Campita	7	2015	0
Andalusia	Almería	Sierra de Gador-Llano de Canjayar	8	2004	-1
Andalusia	Almería	Sierra de Gador-Llano de Canjayar	8	2005	4
Andalusia	Almería	Sierra de Gador-Llano de Canjayar	8	2006	3
Andalusia	Almería	Sierra de Gador-Llano de Canjayar	8	2007	6
Andalusia	Almería	Sierra de Gador-Llano de Canjayar	8	2008	4
Andalusia	Almería	Sierra de Gador-Llano de Canjayar	8	2009	4
Andalusia	Almería	Sierra de Gador-Llano de Canjayar	8	2010	4
Andalusia	Almería	Sierra de Gador-Llano de Canjayar	8	2011	2
Andalusia	Almería	Sierra de Gador-Llano de Canjayar	8	2012	2
Andalusia	Almería	Sierra de Gador-Llano de Canjayar	8	2013	-1
Andalusia	Almería	Sierra de Gador-Llano de Canjayar	8	2014	-1
Andalusia	Almería	Sierra de Gador-Llano de Canjayar	8	2015	0
Andalusia	Almería	Sierra de Gador-Llano de la Mota	9	2004	-1
Andalusia	Almería	Sierra de Gador-Llano de la Mota	9	2005	-1
Andalusia	Almería	Sierra de Gador-Llano de la Mota	9	2006	-1
Andalusia	Almería	Sierra de Gador-Llano de la Mota	9	2007	-1
Andalusia	Almería	Sierra de Gador-Llano de la Mota	9	2008	1
Andalusia	Almería	Sierra de Gador-Llano de la Mota	9	2009	0
Andalusia	Almería	Sierra de Gador-Llano de la Mota	9	2010	0
Andalusia	Almería	Sierra de Gador-Llano de la Mota	9	2011	0
Andalusia	Almería	Sierra de Gador-Llano de la Mota	9	2012	0
Andalusia	Almería	Sierra de Gador-Llano de la Mota	9	2013	-1
Andalusia	Almería	Sierra de Gador-Llano de la Mota	9	2014	-1
Andalusia	Almería	Sierra de Gador-Llano de la Mota	9	2015	0
Andalusia	Almería	Sierra de Gador-Llano de los Brincos	10	2004	-1
Andalusia	Almería	Sierra de Gador-Llano de los Brincos	10	2005	-1
Andalusia	Almería	Sierra de Gador-Llano de los Brincos	10	2006	-1
Andalusia	Almería	Sierra de Gador-Llano de los Brincos	10	2007	-1
Andalusia	Almería	Sierra de Gador-Llano de los Brincos	10	2008	-1
Andalusia	Almería	Sierra de Gador-Llano de los Brincos	10	2009	1
Andalusia	Almería	Sierra de Gador-Llano de los Brincos	10	2010	0
Andalusia	Almería	Sierra de Gador-Llano de los Brincos	10	2011	0
Andalusia	Almería	Sierra de Gador-Llano de los Brincos	10	2012	0
Andalusia	Almería	Sierra de Gador-Llano de los Brincos	10	2013	-1
Andalusia	Almería	Sierra de Gador-Llano de los Brincos	10	2014	-1
Andalusia	Almería	Sierra de Gador-Llano de los Brincos	10	2015	1
Andalusia	Almería	Tabernas-Sorbas-Karst en yesos de Sorbas	11	2004	-1
Andalusia	Almería	Tabernas-Sorbas-Karst en yesos de Sorbas	11	2005	-1
Andalusia	Almería	Tabernas-Sorbas-Karst en yesos de Sorbas	11	2006	1
Andalusia	Almería	Tabernas-Sorbas-Karst en yesos de Sorbas	11	2007	-1
Andalusia	Almería	Tabernas-Sorbas-Karst en yesos de Sorbas	11	2008	-1
Andalusia	Almería	Tabernas-Sorbas-Karst en yesos de Sorbas	11	2009	-1
Andalusia	Almería	Tabernas-Sorbas-Karst en yesos de Sorbas	11	2010	-1
Andalusia	Almería	Tabernas-Sorbas-Karst en yesos de Sorbas	11	2011	-1
Andalusia	Almería	Tabernas-Sorbas-Karst en yesos de Sorbas	11	2012	4
Andalusia	Almería	Tabernas-Sorbas-Karst en yesos de Sorbas	11	2013	-1
Andalusia	Almería	Tabernas-Sorbas-Karst en yesos de Sorbas	11	2014	-1
Andalusia	Almería	Tabernas-Sorbas-Karst en yesos de Sorbas	11	2015	4
Andalusia	Almería	Tabernas-Sorbas-Los Pilares	12	2004	-1
Andalusia	Almería	Tabernas-Sorbas-Los Pilares	12	2005	-1
Andalusia	Almería	Tabernas-Sorbas-Los Pilares	12	2006	-1
Andalusia	Almería	Tabernas-Sorbas-Los Pilares	12	2007	-1
Andalusia	Almería	Tabernas-Sorbas-Los Pilares	12	2008	-1
Andalusia	Almería	Tabernas-Sorbas-Los Pilares	12	2009	1
Andalusia	Almería	Tabernas-Sorbas-Los Pilares	12	2010	0
Andalusia	Almería	Tabernas-Sorbas-Los Pilares	12	2011	0
Andalusia	Almería	Tabernas-Sorbas-Los Pilares	12	2012	0
Andalusia	Almería	Tabernas-Sorbas-Los Pilares	12	2013	-1
Andalusia	Almería	Tabernas-Sorbas-Los Pilares	12	2014	-1
Andalusia	Almería	Tabernas-Sorbas-Los Pilares	12	2015	0
Andalusia	Almería	Tabernas-Sorbas-Los Sebastianes	13	2004	-1
Andalusia	Almería	Tabernas-Sorbas-Los Sebastianes	13	2005	-1
Andalusia	Almería	Tabernas-Sorbas-Los Sebastianes	13	2006	1
Andalusia	Almería	Tabernas-Sorbas-Los Sebastianes	13	2007	5
Andalusia	Almería	Tabernas-Sorbas-Los Sebastianes	13	2008	11
Andalusia	Almería	Tabernas-Sorbas-Los Sebastianes	13	2009	9
Andalusia	Almería	Tabernas-Sorbas-Los Sebastianes	13	2010	7
Andalusia	Almería	Tabernas-Sorbas-Los Sebastianes	13	2011	6
Andalusia	Almería	Tabernas-Sorbas-Los Sebastianes	13	2012	11
Andalusia	Almería	Tabernas-Sorbas-Los Sebastianes	13	2013	-1
Andalusia	Almería	Tabernas-Sorbas-Los Sebastianes	13	2014	-1
Andalusia	Almería	Tabernas-Sorbas-Los Sebastianes	13	2015	2
Castile-Leon	Burgos	Casanova	14	2004	-1
Castile-Leon	Burgos	Casanova	14	2005	4
Castile-Leon	Burgos	Casanova	14	2006	-1
Castile-Leon	Burgos	Casanova	14	2007	-1
Castile-Leon	Burgos	Casanova	14	2008	4
Castile-Leon	Burgos	Casanova	14	2009	4
Castile-Leon	Burgos	Casanova	14	2010	3
Castile-Leon	Burgos	Casanova	14	2011	1
Castile-Leon	Burgos	Casanova	14	2012	0
Castile-Leon	Burgos	Casanova	14	2013	0
Castile-Leon	Burgos	Casanova	14	2014	0
Castile-Leon	Burgos	Casanova	14	2015	0
Castile-Leon	Burgos	Corcos-Campejon	15	2004	-1
Castile-Leon	Burgos	Corcos-Campejon	15	2005	-1
Castile-Leon	Burgos	Corcos-Campejon	15	2006	-1
Castile-Leon	Burgos	Corcos-Campejon	15	2007	-1
Castile-Leon	Burgos	Corcos-Campejon	15	2008	6
Castile-Leon	Burgos	Corcos-Campejon	15	2009	7
Castile-Leon	Burgos	Corcos-Campejon	15	2010	5
Castile-Leon	Burgos	Corcos-Campejon	15	2011	4
Castile-Leon	Burgos	Corcos-Campejon	15	2012	4
Castile-Leon	Burgos	Corcos-Campejon	15	2013	5
Castile-Leon	Burgos	Corcos-Campejon	15	2014	4
Castile-Leon	Burgos	Corcos-Campejon	15	2015	5
Castile-Leon	Burgos	Corcos-Las Mesas	16	2004	-1
Castile-Leon	Burgos	Corcos-Las Mesas	16	2005	-1
Castile-Leon	Burgos	Corcos-Las Mesas	16	2006	-1
Castile-Leon	Burgos	Corcos-Las Mesas	16	2007	-1
Castile-Leon	Burgos	Corcos-Las Mesas	16	2008	3
Castile-Leon	Burgos	Corcos-Las Mesas	16	2009	3
Castile-Leon	Burgos	Corcos-Las Mesas	16	2010	4
Castile-Leon	Burgos	Corcos-Las Mesas	16	2011	1
Castile-Leon	Burgos	Corcos-Las Mesas	16	2012	4
Castile-Leon	Burgos	Corcos-Las Mesas	16	2013	2
Castile-Leon	Burgos	Corcos-Las Mesas	16	2014	3
Castile-Leon	Burgos	Corcos-Las Mesas	16	2015	2
Catalonia	Cataluña	Alfes-Aerodromo	17	2004	7
Catalonia	Cataluña	Alfes-Aerodromo	17	2005	0
Catalonia	Cataluña	Alfes-Aerodromo	17	2006	0
Catalonia	Cataluña	Alfes-Aerodromo	17	2007	0
Catalonia	Cataluña	Alfes-Aerodromo	17	2008	-1
Catalonia	Cataluña	Alfes-Aerodromo	17	2009	-1
Catalonia	Cataluña	Alfes-Aerodromo	17	2010	-1
Catalonia	Cataluña	Alfes-Aerodromo	17	2011	-1
Catalonia	Cataluña	Alfes-Aerodromo	17	2012	-1
Catalonia	Cataluña	Alfes-Aerodromo	17	2013	-1
Catalonia	Cataluña	Alfes-Aerodromo	17	2014	-1
Catalonia	Cataluña	Alfes-Aerodromo	17	2015	4
Castile-La Mancha	Cuenca	Carboneras de Guadazaon	18	2004	9
Castile-La Mancha	Cuenca	Carboneras de Guadazaon	18	2005	-1
Castile-La Mancha	Cuenca	Carboneras de Guadazaon	18	2006	-1
Castile-La Mancha	Cuenca	Carboneras de Guadazaon	18	2007	-1
Castile-La Mancha	Cuenca	Carboneras de Guadazaon	18	2008	-1
Castile-La Mancha	Cuenca	Carboneras de Guadazaon	18	2009	-1
Castile-La Mancha	Cuenca	Carboneras de Guadazaon	18	2010	-1
Castile-La Mancha	Cuenca	Carboneras de Guadazaon	18	2011	-1
Castile-La Mancha	Cuenca	Carboneras de Guadazaon	18	2012	-1
Castile-La Mancha	Cuenca	Carboneras de Guadazaon	18	2013	-1
Castile-La Mancha	Cuenca	Carboneras de Guadazaon	18	2014	-1
Castile-La Mancha	Cuenca	Carboneras de Guadazaon	18	2015	-1
Castile-La Mancha	Cuenca	Moya-Pedro Izquierdo	19	2004	29
Castile-La Mancha	Cuenca	Moya-Pedro Izquierdo	19	2005	-1
Castile-La Mancha	Cuenca	Moya-Pedro Izquierdo	19	2006	-1
Castile-La Mancha	Cuenca	Moya-Pedro Izquierdo	19	2007	-1
Castile-La Mancha	Cuenca	Moya-Pedro Izquierdo	19	2008	-1
Castile-La Mancha	Cuenca	Moya-Pedro Izquierdo	19	2009	-1
Castile-La Mancha	Cuenca	Moya-Pedro Izquierdo	19	2010	-1
Castile-La Mancha	Cuenca	Moya-Pedro Izquierdo	19	2011	-1
Castile-La Mancha	Cuenca	Moya-Pedro Izquierdo	19	2012	-1
Castile-La Mancha	Cuenca	Moya-Pedro Izquierdo	19	2013	-1
Castile-La Mancha	Cuenca	Moya-Pedro Izquierdo	19	2014	-1
Castile-La Mancha	Cuenca	Moya-Pedro Izquierdo	19	2015	-1
Castile-La Mancha	Cuenca	Valeria-Los LlanosW	20	2004	25
Castile-La Mancha	Cuenca	Valeria-Los LlanosW	20	2005	-1
Castile-La Mancha	Cuenca	Valeria-Los LlanosW	20	2006	-1
Castile-La Mancha	Cuenca	Valeria-Los LlanosW	20	2007	-1
Castile-La Mancha	Cuenca	Valeria-Los LlanosW	20	2008	-1
Castile-La Mancha	Cuenca	Valeria-Los LlanosW	20	2009	-1
Castile-La Mancha	Cuenca	Valeria-Los LlanosW	20	2010	-1
Castile-La Mancha	Cuenca	Valeria-Los LlanosW	20	2011	-1
Castile-La Mancha	Cuenca	Valeria-Los LlanosW	20	2012	-1
Castile-La Mancha	Cuenca	Valeria-Los LlanosW	20	2013	-1
Castile-La Mancha	Cuenca	Valeria-Los LlanosW	20	2014	-1
Castile-La Mancha	Cuenca	Valeria-Los LlanosW	20	2015	-1
Andalusia	Granada	Lomas Padul-Cerro del Aulagar	21	2004	17
Andalusia	Granada	Lomas Padul-Cerro del Aulagar	21	2005	12
Andalusia	Granada	Lomas Padul-Cerro del Aulagar	21	2006	9
Andalusia	Granada	Lomas Padul-Cerro del Aulagar	21	2007	7
Andalusia	Granada	Lomas Padul-Cerro del Aulagar	21	2008	5
Andalusia	Granada	Lomas Padul-Cerro del Aulagar	21	2009	6
Andalusia	Granada	Lomas Padul-Cerro del Aulagar	21	2010	9
Andalusia	Granada	Lomas Padul-Cerro del Aulagar	21	2011	5
Andalusia	Granada	Lomas Padul-Cerro del Aulagar	21	2012	3
Andalusia	Granada	Lomas Padul-Cerro del Aulagar	21	2013	3
Andalusia	Granada	Lomas Padul-Cerro del Aulagar	21	2014	0
Andalusia	Granada	Lomas Padul-Cerro del Aulagar	21	2015	2
Andalusia	Granada	Lomas Padul-Gororon	22	2004	-1
Andalusia	Granada	Lomas Padul-Gororon	22	2005	-1
Andalusia	Granada	Lomas Padul-Gororon	22	2006	2
Andalusia	Granada	Lomas Padul-Gororon	22	2007	1
Andalusia	Granada	Lomas Padul-Gororon	22	2008	0
Andalusia	Granada	Lomas Padul-Gororon	22	2009	0
Andalusia	Granada	Lomas Padul-Gororon	22	2010	1
Andalusia	Granada	Lomas Padul-Gororon	22	2011	0
Andalusia	Granada	Lomas Padul-Gororon	22	2012	0
Andalusia	Granada	Lomas Padul-Gororon	22	2013	0
Andalusia	Granada	Lomas Padul-Gororon	22	2014	0
Andalusia	Granada	Lomas Padul-Gororon	22	2015	0
Andalusia	Granada	Sierra de Baza-Filabres	23	2004	-1
Andalusia	Granada	Sierra de Baza-Filabres	23	2005	-1
Andalusia	Granada	Sierra de Baza-Filabres	23	2006	-1
Andalusia	Granada	Sierra de Baza-Filabres	23	2007	-1
Andalusia	Granada	Sierra de Baza-Filabres	23	2008	-1
Andalusia	Granada	Sierra de Baza-Filabres	23	2009	2
Andalusia	Granada	Sierra de Baza-Filabres	23	2010	3
Andalusia	Granada	Sierra de Baza-Filabres	23	2011	3
Andalusia	Granada	Sierra de Baza-Filabres	23	2012	0
Andalusia	Granada	Sierra de Baza-Filabres	23	2013	1
Andalusia	Granada	Sierra de Baza-Filabres	23	2014	0
Andalusia	Granada	Sierra de Baza-Filabres	23	2015	0
Castile-La Mancha	Guadalajara	Atienza-Dos PueblosW	24	2004	-1
Castile-La Mancha	Guadalajara	Atienza-Dos PueblosW	24	2005	-1
Castile-La Mancha	Guadalajara	Atienza-Dos PueblosW	24	2006	18
Castile-La Mancha	Guadalajara	Atienza-Dos PueblosW	24	2007	-1
Castile-La Mancha	Guadalajara	Atienza-Dos PueblosW	24	2008	25
Castile-La Mancha	Guadalajara	Atienza-Dos PueblosW	24	2009	20
Castile-La Mancha	Guadalajara	Atienza-Dos PueblosW	24	2010	18
Castile-La Mancha	Guadalajara	Atienza-Dos PueblosW	24	2011	19
Castile-La Mancha	Guadalajara	Atienza-Dos PueblosW	24	2012	24
Castile-La Mancha	Guadalajara	Atienza-Dos PueblosW	24	2013	36
Castile-La Mancha	Guadalajara	Atienza-Dos PueblosW	24	2014	25
Castile-La Mancha	Guadalajara	Atienza-Dos PueblosW	24	2015	-1
Castile-La Mancha	Guadalajara	Atienza-Dos Pueblos_Centre	25	2004	-1
Castile-La Mancha	Guadalajara	Atienza-Dos Pueblos_Centre	25	2005	-1
Castile-La Mancha	Guadalajara	Atienza-Dos Pueblos_Centre	25	2006	11
Castile-La Mancha	Guadalajara	Atienza-Dos Pueblos_Centre	25	2007	-1
Castile-La Mancha	Guadalajara	Atienza-Dos Pueblos_Centre	25	2008	8
Castile-La Mancha	Guadalajara	Atienza-Dos Pueblos_Centre	25	2009	9
Castile-La Mancha	Guadalajara	Atienza-Dos Pueblos_Centre	25	2010	6
Castile-La Mancha	Guadalajara	Atienza-Dos Pueblos_Centre	25	2011	15
Castile-La Mancha	Guadalajara	Atienza-Dos Pueblos_Centre	25	2012	24
Castile-La Mancha	Guadalajara	Atienza-Dos Pueblos_Centre	25	2013	23
Castile-La Mancha	Guadalajara	Atienza-Dos Pueblos_Centre	25	2014	23
Castile-La Mancha	Guadalajara	Atienza-Dos Pueblos_Centre	25	2015	-1
Castile-La Mancha	Guadalajara	Atienza-Dos PueblosE	26	2004	-1
Castile-La Mancha	Guadalajara	Atienza-Dos PueblosE	26	2005	-1
Castile-La Mancha	Guadalajara	Atienza-Dos PueblosE	26	2006	9
Castile-La Mancha	Guadalajara	Atienza-Dos PueblosE	26	2007	-1
Castile-La Mancha	Guadalajara	Atienza-Dos PueblosE	26	2008	10
Castile-La Mancha	Guadalajara	Atienza-Dos PueblosE	26	2009	8
Castile-La Mancha	Guadalajara	Atienza-Dos PueblosE	26	2010	5
Castile-La Mancha	Guadalajara	Atienza-Dos PueblosE	26	2011	4
Castile-La Mancha	Guadalajara	Atienza-Dos PueblosE	26	2012	6
Castile-La Mancha	Guadalajara	Atienza-Dos PueblosE	26	2013	7
Castile-La Mancha	Guadalajara	Atienza-Dos PueblosE	26	2014	10
Castile-La Mancha	Guadalajara	Atienza-Dos PueblosE	26	2015	-1
Castile-La Mancha	Guadalajara	Esplegares	27	2004	16
Castile-La Mancha	Guadalajara	Esplegares	27	2005	-1
Castile-La Mancha	Guadalajara	Esplegares	27	2006	-1
Castile-La Mancha	Guadalajara	Esplegares	27	2007	-1
Castile-La Mancha	Guadalajara	Esplegares	27	2008	-1
Castile-La Mancha	Guadalajara	Esplegares	27	2009	-1
Castile-La Mancha	Guadalajara	Esplegares	27	2010	-1
Castile-La Mancha	Guadalajara	Esplegares	27	2011	-1
Castile-La Mancha	Guadalajara	Esplegares	27	2012	-1
Castile-La Mancha	Guadalajara	Esplegares	27	2013	-1
Castile-La Mancha	Guadalajara	Esplegares	27	2014	-1
Castile-La Mancha	Guadalajara	Esplegares	27	2015	5
Castile-La Mancha	Guadalajara	Molina-WFPicazo	28	2004	-1
Castile-La Mancha	Guadalajara	Molina-WFPicazo	28	2005	-1
Castile-La Mancha	Guadalajara	Molina-WFPicazo	28	2006	-1
Castile-La Mancha	Guadalajara	Molina-WFPicazo	28	2007	-1
Castile-La Mancha	Guadalajara	Molina-WFPicazo	28	2008	-1
Castile-La Mancha	Guadalajara	Molina-WFPicazo	28	2009	4
Castile-La Mancha	Guadalajara	Molina-WFPicazo	28	2010	0
Castile-La Mancha	Guadalajara	Molina-WFPicazo	28	2011	0
Castile-La Mancha	Guadalajara	Molina-WFPicazo	28	2012	0
Castile-La Mancha	Guadalajara	Molina-WFPicazo	28	2013	0
Castile-La Mancha	Guadalajara	Molina-WFPicazo	28	2014	0
Castile-La Mancha	Guadalajara	Molina-WFPicazo	28	2015	-1
Castile-La Mancha	Guadalajara	Molina-WFPeñaII	29	2004	-1
Castile-La Mancha	Guadalajara	Molina-WFPeñaII	29	2005	-1
Castile-La Mancha	Guadalajara	Molina-WFPeñaII	29	2006	-1
Castile-La Mancha	Guadalajara	Molina-WFPeñaII	29	2007	-1
Castile-La Mancha	Guadalajara	Molina-WFPeñaII	29	2008	-1
Castile-La Mancha	Guadalajara	Molina-WFPeñaII	29	2009	1
Castile-La Mancha	Guadalajara	Molina-WFPeñaII	29	2010	0
Castile-La Mancha	Guadalajara	Molina-WFPeñaII	29	2011	0
Castile-La Mancha	Guadalajara	Molina-WFPeñaII	29	2012	0
Castile-La Mancha	Guadalajara	Molina-WFPeñaII	29	2013	0
Castile-La Mancha	Guadalajara	Molina-WFPeñaII	29	2014	0
Castile-La Mancha	Guadalajara	Molina-WFPeñaII	29	2015	-1
Castile-La Mancha	Guadalajara	Molina-WFSanGil	30	2004	-1
Castile-La Mancha	Guadalajara	Molina-WFSanGil	30	2005	-1
Castile-La Mancha	Guadalajara	Molina-WFSanGil	30	2006	-1
Castile-La Mancha	Guadalajara	Molina-WFSanGil	30	2007	-1
Castile-La Mancha	Guadalajara	Molina-WFSanGil	30	2008	-1
Castile-La Mancha	Guadalajara	Molina-WFSanGil	30	2009	9
Castile-La Mancha	Guadalajara	Molina-WFSanGil	30	2010	3
Castile-La Mancha	Guadalajara	Molina-WFSanGil	30	2011	2
Castile-La Mancha	Guadalajara	Molina-WFSanGil	30	2012	1
Castile-La Mancha	Guadalajara	Molina-WFSanGil	30	2013	2
Castile-La Mancha	Guadalajara	Molina-WFSanGil	30	2014	2
Castile-La Mancha	Guadalajara	Molina-WFSanGil	30	2015	-1
Castile-La Mancha	Guadalajara	Molina-WF Loma Gorda	31	2004	-1
Castile-La Mancha	Guadalajara	Molina-WF Loma Gorda	31	2005	-1
Castile-La Mancha	Guadalajara	Molina-WF Loma Gorda	31	2006	-1
Castile-La Mancha	Guadalajara	Molina-WF Loma Gorda	31	2007	-1
Castile-La Mancha	Guadalajara	Molina-WF Loma Gorda	31	2008	-1
Castile-La Mancha	Guadalajara	Molina-WF Loma Gorda	31	2009	7
Castile-La Mancha	Guadalajara	Molina-WF Loma Gorda	31	2010	2
Castile-La Mancha	Guadalajara	Molina-WF Loma Gorda	31	2011	1
Castile-La Mancha	Guadalajara	Molina-WF Loma Gorda	31	2012	0
Castile-La Mancha	Guadalajara	Molina-WF Loma Gorda	31	2013	0
Castile-La Mancha	Guadalajara	Molina-WF Loma Gorda	31	2014	0
Castile-La Mancha	Guadalajara	Molina-WF Loma Gorda	31	2015	-1
Castile-La Mancha	Guadalajara	Molina-ZEPA E Hinojosa	32	2004	27
Castile-La Mancha	Guadalajara	Molina-ZEPA E Hinojosa	32	2005	-1
Castile-La Mancha	Guadalajara	Molina-ZEPA E Hinojosa	32	2006	-1
Castile-La Mancha	Guadalajara	Molina-ZEPA E Hinojosa	32	2007	-1
Castile-La Mancha	Guadalajara	Molina-ZEPA E Hinojosa	32	2008	-1
Castile-La Mancha	Guadalajara	Molina-ZEPA E Hinojosa	32	2009	8
Castile-La Mancha	Guadalajara	Molina-ZEPA E Hinojosa	32	2010	10
Castile-La Mancha	Guadalajara	Molina-ZEPA E Hinojosa	32	2011	16
Castile-La Mancha	Guadalajara	Molina-ZEPA E Hinojosa	32	2012	26
Castile-La Mancha	Guadalajara	Molina-ZEPA E Hinojosa	32	2013	27
Castile-La Mancha	Guadalajara	Molina-ZEPA E Hinojosa	32	2014	32
Castile-La Mancha	Guadalajara	Molina-ZEPA E Hinojosa	32	2015	-1
Castile-La Mancha	Guadalajara	Molina-ZEPA N Torrubia	33	2004	-1
Castile-La Mancha	Guadalajara	Molina-ZEPA N Torrubia	33	2005	-1
Castile-La Mancha	Guadalajara	Molina-ZEPA N Torrubia	33	2006	-1
Castile-La Mancha	Guadalajara	Molina-ZEPA N Torrubia	33	2007	-1
Castile-La Mancha	Guadalajara	Molina-ZEPA N Torrubia	33	2008	-1
Castile-La Mancha	Guadalajara	Molina-ZEPA N Torrubia	33	2009	4
Castile-La Mancha	Guadalajara	Molina-ZEPA N Torrubia	33	2010	6
Castile-La Mancha	Guadalajara	Molina-ZEPA N Torrubia	33	2011	5
Castile-La Mancha	Guadalajara	Molina-ZEPA N Torrubia	33	2012	6
Castile-La Mancha	Guadalajara	Molina-ZEPA N Torrubia	33	2013	5
Castile-La Mancha	Guadalajara	Molina-ZEPA N Torrubia	33	2014	7
Castile-La Mancha	Guadalajara	Molina-ZEPA N Torrubia	33	2015	-1
Castile-La Mancha	Guadalajara	Molina-ZEPA W CM210	34	2004	35
Castile-La Mancha	Guadalajara	Molina-ZEPA W CM210	34	2005	-1
Castile-La Mancha	Guadalajara	Molina-ZEPA W CM210	34	2006	-1
Castile-La Mancha	Guadalajara	Molina-ZEPA W CM210	34	2007	-1
Castile-La Mancha	Guadalajara	Molina-ZEPA W CM210	34	2008	-1
Castile-La Mancha	Guadalajara	Molina-ZEPA W CM210	34	2009	-1
Castile-La Mancha	Guadalajara	Molina-ZEPA W CM210	34	2010	13
Castile-La Mancha	Guadalajara	Molina-ZEPA W CM210	34	2011	23
Castile-La Mancha	Guadalajara	Molina-ZEPA W CM210	34	2012	30
Castile-La Mancha	Guadalajara	Molina-ZEPA W CM210	34	2013	21
Castile-La Mancha	Guadalajara	Molina-ZEPA W CM210	34	2014	23
Castile-La Mancha	Guadalajara	Molina-ZEPA W CM210	34	2015	-1
Castile-La Mancha	Guadalajara	Molina-ZEPA E CM210	35	2004	48
Castile-La Mancha	Guadalajara	Molina-ZEPA E CM210	35	2005	-1
Castile-La Mancha	Guadalajara	Molina-ZEPA E CM210	35	2006	-1
Castile-La Mancha	Guadalajara	Molina-ZEPA E CM210	35	2007	-1
Castile-La Mancha	Guadalajara	Molina-ZEPA E CM210	35	2008	-1
Castile-La Mancha	Guadalajara	Molina-ZEPA E CM210	35	2009	-1
Castile-La Mancha	Guadalajara	Molina-ZEPA E CM210	35	2010	13
Castile-La Mancha	Guadalajara	Molina-ZEPA E CM210	35	2011	25
Castile-La Mancha	Guadalajara	Molina-ZEPA E CM210	35	2012	31
Castile-La Mancha	Guadalajara	Molina-ZEPA E CM210	35	2013	34
Castile-La Mancha	Guadalajara	Molina-ZEPA E CM210	35	2014	18
Castile-La Mancha	Guadalajara	Molina-ZEPA E CM210	35	2015	-1
Castile-La Mancha	Guadalajara	Molina-ZEPA N Embid	36	2004	48
Castile-La Mancha	Guadalajara	Molina-ZEPA N Embid	36	2005	-1
Castile-La Mancha	Guadalajara	Molina-ZEPA N Embid	36	2006	-1
Castile-La Mancha	Guadalajara	Molina-ZEPA N Embid	36	2007	-1
Castile-La Mancha	Guadalajara	Molina-ZEPA N Embid	36	2008	-1
Castile-La Mancha	Guadalajara	Molina-ZEPA N Embid	36	2009	-1
Castile-La Mancha	Guadalajara	Molina-ZEPA N Embid	36	2010	-1
Castile-La Mancha	Guadalajara	Molina-ZEPA N Embid	36	2011	-1
Castile-La Mancha	Guadalajara	Molina-ZEPA N Embid	36	2012	-1
Castile-La Mancha	Guadalajara	Molina-ZEPA N Embid	36	2013	44
Castile-La Mancha	Guadalajara	Molina-ZEPA N Embid	36	2014	44
Castile-La Mancha	Guadalajara	Molina-ZEPA N Embid	36	2015	-1
Castile-La Mancha	Guadalajara	Molina-Medianeros	37	2004	-1
Castile-La Mancha	Guadalajara	Molina-Medianeros	37	2005	-1
Castile-La Mancha	Guadalajara	Molina-Medianeros	37	2006	-1
Castile-La Mancha	Guadalajara	Molina-Medianeros	37	2007	-1
Castile-La Mancha	Guadalajara	Molina-Medianeros	37	2008	-1
Castile-La Mancha	Guadalajara	Molina-Medianeros	37	2009	5
Castile-La Mancha	Guadalajara	Molina-Medianeros	37	2010	2
Castile-La Mancha	Guadalajara	Molina-Medianeros	37	2011	3
Castile-La Mancha	Guadalajara	Molina-Medianeros	37	2012	6
Castile-La Mancha	Guadalajara	Molina-Medianeros	37	2013	3
Castile-La Mancha	Guadalajara	Molina-Medianeros	37	2014	4
Castile-La Mancha	Guadalajara	Molina-Medianeros	37	2015	-1
Castile-La Mancha	Guadalajara	Molina-Loma de la Fuente	38	2004	-1
Castile-La Mancha	Guadalajara	Molina-Loma de la Fuente	38	2005	-1
Castile-La Mancha	Guadalajara	Molina-Loma de la Fuente	38	2006	-1
Castile-La Mancha	Guadalajara	Molina-Loma de la Fuente	38	2007	-1
Castile-La Mancha	Guadalajara	Molina-Loma de la Fuente	38	2008	-1
Castile-La Mancha	Guadalajara	Molina-Loma de la Fuente	38	2009	1
Castile-La Mancha	Guadalajara	Molina-Loma de la Fuente	38	2010	1
Castile-La Mancha	Guadalajara	Molina-Loma de la Fuente	38	2011	0
Castile-La Mancha	Guadalajara	Molina-Loma de la Fuente	38	2012	0
Castile-La Mancha	Guadalajara	Molina-Loma de la Fuente	38	2013	0
Castile-La Mancha	Guadalajara	Molina-Loma de la Fuente	38	2014	0
Castile-La Mancha	Guadalajara	Molina-Loma de la Fuente	38	2015	-1
Castile-La Mancha	Guadalajara	Ribarredonda	39	2004	19
Castile-La Mancha	Guadalajara	Ribarredonda	39	2005	-1
Castile-La Mancha	Guadalajara	Ribarredonda	39	2006	-1
Castile-La Mancha	Guadalajara	Ribarredonda	39	2007	-1
Castile-La Mancha	Guadalajara	Ribarredonda	39	2008	-1
Castile-La Mancha	Guadalajara	Ribarredonda	39	2009	-1
Castile-La Mancha	Guadalajara	Ribarredonda	39	2010	-1
Castile-La Mancha	Guadalajara	Ribarredonda	39	2011	-1
Castile-La Mancha	Guadalajara	Ribarredonda	39	2012	-1
Castile-La Mancha	Guadalajara	Ribarredonda	39	2013	-1
Castile-La Mancha	Guadalajara	Ribarredonda	39	2014	-1
Castile-La Mancha	Guadalajara	Ribarredonda	39	2015	9
Castile-La Mancha	Guadalajara	Sacecorbo	40	2004	2
Castile-La Mancha	Guadalajara	Sacecorbo	40	2005	-1
Castile-La Mancha	Guadalajara	Sacecorbo	40	2006	-1
Castile-La Mancha	Guadalajara	Sacecorbo	40	2007	-1
Castile-La Mancha	Guadalajara	Sacecorbo	40	2008	-1
Castile-La Mancha	Guadalajara	Sacecorbo	40	2009	-1
Castile-La Mancha	Guadalajara	Sacecorbo	40	2010	-1
Castile-La Mancha	Guadalajara	Sacecorbo	40	2011	-1
Castile-La Mancha	Guadalajara	Sacecorbo	40	2012	-1
Castile-La Mancha	Guadalajara	Sacecorbo	40	2013	-1
Castile-La Mancha	Guadalajara	Sacecorbo	40	2014	-1
Castile-La Mancha	Guadalajara	Sacecorbo	40	2015	0
Castile-La Mancha	Guadalajara	Torresaviñan-Las Morras	41	2004	20
Castile-La Mancha	Guadalajara	Torresaviñan-Las Morras	41	2005	-1
Castile-La Mancha	Guadalajara	Torresaviñan-Las Morras	41	2006	-1
Castile-La Mancha	Guadalajara	Torresaviñan-Las Morras	41	2007	-1
Castile-La Mancha	Guadalajara	Torresaviñan-Las Morras	41	2008	-1
Castile-La Mancha	Guadalajara	Torresaviñan-Las Morras	41	2009	-1
Castile-La Mancha	Guadalajara	Torresaviñan-Las Morras	41	2010	-1
Castile-La Mancha	Guadalajara	Torresaviñan-Las Morras	41	2011	-1
Castile-La Mancha	Guadalajara	Torresaviñan-Las Morras	41	2012	10
Castile-La Mancha	Guadalajara	Torresaviñan-Las Morras	41	2013	-1
Castile-La Mancha	Guadalajara	Torresaviñan-Las Morras	41	2014	-1
Castile-La Mancha	Guadalajara	Torresaviñan-Las Morras	41	2015	8
Aragon	Huesca	Llanos de Ballobar	42	2004	-1
Aragon	Huesca	Llanos de Ballobar	42	2005	-1
Aragon	Huesca	Llanos de Ballobar	42	2006	-1
Aragon	Huesca	Llanos de Ballobar	42	2007	11
Aragon	Huesca	Llanos de Ballobar	42	2008	16
Aragon	Huesca	Llanos de Ballobar	42	2009	16
Aragon	Huesca	Llanos de Ballobar	42	2010	-1
Aragon	Huesca	Llanos de Ballobar	42	2011	-1
Aragon	Huesca	Llanos de Ballobar	42	2012	-1
Aragon	Huesca	Llanos de Ballobar	42	2013	14
Aragon	Huesca	Llanos de Ballobar	42	2014	13
Aragon	Huesca	Llanos de Ballobar	42	2015	20
Region of Murcia	Murcia	Cieza-Sierra del Picarcho	43	2004	12
Region of Murcia	Murcia	Cieza-Sierra del Picarcho	43	2005	27
Region of Murcia	Murcia	Cieza-Sierra del Picarcho	43	2006	7
Region of Murcia	Murcia	Cieza-Sierra del Picarcho	43	2007	-1
Region of Murcia	Murcia	Cieza-Sierra del Picarcho	43	2008	22
Region of Murcia	Murcia	Cieza-Sierra del Picarcho	43	2009	23
Region of Murcia	Murcia	Cieza-Sierra del Picarcho	43	2010	22
Region of Murcia	Murcia	Cieza-Sierra del Picarcho	43	2011	12
Region of Murcia	Murcia	Cieza-Sierra del Picarcho	43	2012	18
Region of Murcia	Murcia	Cieza-Sierra del Picarcho	43	2013	17
Region of Murcia	Murcia	Cieza-Sierra del Picarcho	43	2014	-1
Region of Murcia	Murcia	Cieza-Sierra del Picarcho	43	2015	18
Region of Murcia	Murcia	Yecla-Herrada del Manco	44	2004	-1
Region of Murcia	Murcia	Yecla-Herrada del Manco	44	2005	-1
Region of Murcia	Murcia	Yecla-Herrada del Manco	44	2006	-1
Region of Murcia	Murcia	Yecla-Herrada del Manco	44	2007	-1
Region of Murcia	Murcia	Yecla-Herrada del Manco	44	2008	-1
Region of Murcia	Murcia	Yecla-Herrada del Manco	44	2009	1
Region of Murcia	Murcia	Yecla-Herrada del Manco	44	2010	1
Region of Murcia	Murcia	Yecla-Herrada del Manco	44	2011	2
Region of Murcia	Murcia	Yecla-Herrada del Manco	44	2012	2
Region of Murcia	Murcia	Yecla-Herrada del Manco	44	2013	-1
Region of Murcia	Murcia	Yecla-Herrada del Manco	44	2014	-1
Region of Murcia	Murcia	Yecla-Herrada del Manco	44	2015	2
Region of Murcia	Murcia	Yecla-Moratillas	45	2004	-1
Region of Murcia	Murcia	Yecla-Moratillas	45	2005	-1
Region of Murcia	Murcia	Yecla-Moratillas	45	2006	-1
Region of Murcia	Murcia	Yecla-Moratillas	45	2007	-1
Region of Murcia	Murcia	Yecla-Moratillas	45	2008	-1
Region of Murcia	Murcia	Yecla-Moratillas	45	2009	-1
Region of Murcia	Murcia	Yecla-Moratillas	45	2010	2
Region of Murcia	Murcia	Yecla-Moratillas	45	2011	1
Region of Murcia	Murcia	Yecla-Moratillas	45	2012	2
Region of Murcia	Murcia	Yecla-Moratillas	45	2013	-1
Region of Murcia	Murcia	Yecla-Moratillas	45	2014	-1
Region of Murcia	Murcia	Yecla-Moratillas	45	2015	2
Navarre	Navarra	Ablitas-Peñadil	46	2004	33
Navarre	Navarra	Ablitas-Peñadil	46	2005	-1
Navarre	Navarra	Ablitas-Peñadil	46	2006	-1
Navarre	Navarra	Ablitas-Peñadil	46	2007	35
Navarre	Navarra	Ablitas-Peñadil	46	2008	-1
Navarre	Navarra	Ablitas-Peñadil	46	2009	-1
Navarre	Navarra	Ablitas-Peñadil	46	2010	-1
Navarre	Navarra	Ablitas-Peñadil	46	2011	-1
Navarre	Navarra	Ablitas-Peñadil	46	2012	-1
Navarre	Navarra	Ablitas-Peñadil	46	2013	-1
Navarre	Navarra	Ablitas-Peñadil	46	2014	-1
Navarre	Navarra	Ablitas-Peñadil	46	2015	-1
Navarre	Navarra	Aerodromo	47	2004	1
Navarre	Navarra	Aerodromo	47	2005	-1
Navarre	Navarra	Aerodromo	47	2006	-1
Navarre	Navarra	Aerodromo	47	2007	0
Navarre	Navarra	Aerodromo	47	2008	-1
Navarre	Navarra	Aerodromo	47	2009	-1
Navarre	Navarra	Aerodromo	47	2010	-1
Navarre	Navarra	Aerodromo	47	2011	-1
Navarre	Navarra	Aerodromo	47	2012	-1
Navarre	Navarra	Aerodromo	47	2013	-1
Navarre	Navarra	Aerodromo	47	2014	-1
Navarre	Navarra	Aerodromo	47	2015	0
Navarre	Navarra	Bardenas Reales-Poligono de Tiro	48	2004	-1
Navarre	Navarra	Bardenas Reales-Poligono de Tiro	48	2005	-1
Navarre	Navarra	Bardenas Reales-Poligono de Tiro	48	2006	-1
Navarre	Navarra	Bardenas Reales-Poligono de Tiro	48	2007	22
Navarre	Navarra	Bardenas Reales-Poligono de Tiro	48	2008	-1
Navarre	Navarra	Bardenas Reales-Poligono de Tiro	48	2009	-1
Navarre	Navarra	Bardenas Reales-Poligono de Tiro	48	2010	-1
Navarre	Navarra	Bardenas Reales-Poligono de Tiro	48	2011	-1
Navarre	Navarra	Bardenas Reales-Poligono de Tiro	48	2012	-1
Navarre	Navarra	Bardenas Reales-Poligono de Tiro	48	2013	-1
Navarre	Navarra	Bardenas Reales-Poligono de Tiro	48	2014	-1
Navarre	Navarra	Bardenas Reales-Poligono de Tiro	48	2015	20
Castile-Leon	Palencia	Cevico de la Torre-Paramo de Castaneda	49	2004	-1
Castile-Leon	Palencia	Cevico de la Torre-Paramo de Castaneda	49	2005	6
Castile-Leon	Palencia	Cevico de la Torre-Paramo de Castaneda	49	2006	-1
Castile-Leon	Palencia	Cevico de la Torre-Paramo de Castaneda	49	2007	-1
Castile-Leon	Palencia	Cevico de la Torre-Paramo de Castaneda	49	2008	-1
Castile-Leon	Palencia	Cevico de la Torre-Paramo de Castaneda	49	2009	-1
Castile-Leon	Palencia	Cevico de la Torre-Paramo de Castaneda	49	2010	-1
Castile-Leon	Palencia	Cevico de la Torre-Paramo de Castaneda	49	2011	-1
Castile-Leon	Palencia	Cevico de la Torre-Paramo de Castaneda	49	2012	-1
Castile-Leon	Palencia	Cevico de la Torre-Paramo de Castaneda	49	2013	-1
Castile-Leon	Palencia	Cevico de la Torre-Paramo de Castaneda	49	2014	-1
Castile-Leon	Palencia	Cevico de la Torre-Paramo de Castaneda	49	2015	-1
Castile-Leon	Soria	Medinaceli-Adradas	50	2004	-1
Castile-Leon	Soria	Medinaceli-Adradas	50	2005	-1
Castile-Leon	Soria	Medinaceli-Adradas	50	2006	4
Castile-Leon	Soria	Medinaceli-Adradas	50	2007	-1
Castile-Leon	Soria	Medinaceli-Adradas	50	2008	-1
Castile-Leon	Soria	Medinaceli-Adradas	50	2009	-1
Castile-Leon	Soria	Medinaceli-Adradas	50	2010	-1
Castile-Leon	Soria	Medinaceli-Adradas	50	2011	-1
Castile-Leon	Soria	Medinaceli-Adradas	50	2012	0
Castile-Leon	Soria	Medinaceli-Adradas	50	2013	0
Castile-Leon	Soria	Medinaceli-Adradas	50	2014	-1
Castile-Leon	Soria	Medinaceli-Adradas	50	2015	-1
Castile-Leon	Soria	Medinaceli-Aguaviva de la Vega	51	2004	-1
Castile-Leon	Soria	Medinaceli-Aguaviva de la Vega	51	2005	-1
Castile-Leon	Soria	Medinaceli-Aguaviva de la Vega	51	2006	4
Castile-Leon	Soria	Medinaceli-Aguaviva de la Vega	51	2007	-1
Castile-Leon	Soria	Medinaceli-Aguaviva de la Vega	51	2008	10
Castile-Leon	Soria	Medinaceli-Aguaviva de la Vega	51	2009	9
Castile-Leon	Soria	Medinaceli-Aguaviva de la Vega	51	2010	6
Castile-Leon	Soria	Medinaceli-Aguaviva de la Vega	51	2011	-1
Castile-Leon	Soria	Medinaceli-Aguaviva de la Vega	51	2012	1
Castile-Leon	Soria	Medinaceli-Aguaviva de la Vega	51	2013	1
Castile-Leon	Soria	Medinaceli-Aguaviva de la Vega	51	2014	1
Castile-Leon	Soria	Medinaceli-Aguaviva de la Vega	51	2015	0
Castile-Leon	Soria	Medinaceli-Alcubilla de las Peñas	52	2004	-1
Castile-Leon	Soria	Medinaceli-Alcubilla de las Peñas	52	2005	-1
Castile-Leon	Soria	Medinaceli-Alcubilla de las Peñas	52	2006	3
Castile-Leon	Soria	Medinaceli-Alcubilla de las Peñas	52	2007	-1
Castile-Leon	Soria	Medinaceli-Alcubilla de las Peñas	52	2008	4
Castile-Leon	Soria	Medinaceli-Alcubilla de las Peñas	52	2009	13
Castile-Leon	Soria	Medinaceli-Alcubilla de las Peñas	52	2010	6
Castile-Leon	Soria	Medinaceli-Alcubilla de las Peñas	52	2011	-1
Castile-Leon	Soria	Medinaceli-Alcubilla de las Peñas	52	2012	8
Castile-Leon	Soria	Medinaceli-Alcubilla de las Peñas	52	2013	7
Castile-Leon	Soria	Medinaceli-Alcubilla de las Peñas	52	2014	5
Castile-Leon	Soria	Medinaceli-Alcubilla de las Peñas	52	2015	6
Castile-Leon	Soria	Medinaceli-Ambrona Miño	53	2004	-1
Castile-Leon	Soria	Medinaceli-Ambrona Miño	53	2005	-1
Castile-Leon	Soria	Medinaceli-Ambrona Miño	53	2006	-1
Castile-Leon	Soria	Medinaceli-Ambrona Miño	53	2007	-1
Castile-Leon	Soria	Medinaceli-Ambrona Miño	53	2008	57
Castile-Leon	Soria	Medinaceli-Ambrona Miño	53	2009	53
Castile-Leon	Soria	Medinaceli-Ambrona Miño	53	2010	33
Castile-Leon	Soria	Medinaceli-Ambrona Miño	53	2011	-1
Castile-Leon	Soria	Medinaceli-Ambrona Miño	53	2012	43
Castile-Leon	Soria	Medinaceli-Ambrona Miño	53	2013	30
Castile-Leon	Soria	Medinaceli-Ambrona Miño	53	2014	-1
Castile-Leon	Soria	Medinaceli-Ambrona Miño	53	2015	49
Castile-Leon	Soria	Medinaceli-Beltejar	54	2004	-1
Castile-Leon	Soria	Medinaceli-Beltejar	54	2005	-1
Castile-Leon	Soria	Medinaceli-Beltejar	54	2006	3
Castile-Leon	Soria	Medinaceli-Beltejar	54	2007	-1
Castile-Leon	Soria	Medinaceli-Beltejar	54	2008	2
Castile-Leon	Soria	Medinaceli-Beltejar	54	2009	3
Castile-Leon	Soria	Medinaceli-Beltejar	54	2010	2
Castile-Leon	Soria	Medinaceli-Beltejar	54	2011	1
Castile-Leon	Soria	Medinaceli-Beltejar	54	2012	1
Castile-Leon	Soria	Medinaceli-Beltejar	54	2013	1
Castile-Leon	Soria	Medinaceli-Beltejar	54	2014	2
Castile-Leon	Soria	Medinaceli-Beltejar	54	2015	1
Castile-Leon	Soria	Medinaceli-BloconaN	55	2004	-1
Castile-Leon	Soria	Medinaceli-BloconaN	55	2005	-1
Castile-Leon	Soria	Medinaceli-BloconaN	55	2006	-1
Castile-Leon	Soria	Medinaceli-BloconaN	55	2007	-1
Castile-Leon	Soria	Medinaceli-BloconaN	55	2008	24
Castile-Leon	Soria	Medinaceli-BloconaN	55	2009	22
Castile-Leon	Soria	Medinaceli-BloconaN	55	2010	9
Castile-Leon	Soria	Medinaceli-BloconaN	55	2011	15
Castile-Leon	Soria	Medinaceli-BloconaN	55	2012	16
Castile-Leon	Soria	Medinaceli-BloconaN	55	2013	-1
Castile-Leon	Soria	Medinaceli-BloconaN	55	2014	18
Castile-Leon	Soria	Medinaceli-BloconaN	55	2015	12
Castile-Leon	Soria	Medinaceli-BloconaS	56	2004	-1
Castile-Leon	Soria	Medinaceli-BloconaS	56	2005	-1
Castile-Leon	Soria	Medinaceli-BloconaS	56	2006	-1
Castile-Leon	Soria	Medinaceli-BloconaS	56	2007	-1
Castile-Leon	Soria	Medinaceli-BloconaS	56	2008	36
Castile-Leon	Soria	Medinaceli-BloconaS	56	2009	62
Castile-Leon	Soria	Medinaceli-BloconaS	56	2010	33
Castile-Leon	Soria	Medinaceli-BloconaS	56	2011	38
Castile-Leon	Soria	Medinaceli-BloconaS	56	2012	29
Castile-Leon	Soria	Medinaceli-BloconaS	56	2013	-1
Castile-Leon	Soria	Medinaceli-BloconaS	56	2014	25
Castile-Leon	Soria	Medinaceli-BloconaS	56	2015	20
Castile-Leon	Soria	Medinaceli-Paridera de Carenas	57	2004	-1
Castile-Leon	Soria	Medinaceli-Paridera de Carenas	57	2005	-1
Castile-Leon	Soria	Medinaceli-Paridera de Carenas	57	2006	-1
Castile-Leon	Soria	Medinaceli-Paridera de Carenas	57	2007	-1
Castile-Leon	Soria	Medinaceli-Paridera de Carenas	57	2008	1
Castile-Leon	Soria	Medinaceli-Paridera de Carenas	57	2009	1
Castile-Leon	Soria	Medinaceli-Paridera de Carenas	57	2010	1
Castile-Leon	Soria	Medinaceli-Paridera de Carenas	57	2011	1
Castile-Leon	Soria	Medinaceli-Paridera de Carenas	57	2012	1
Castile-Leon	Soria	Medinaceli-Paridera de Carenas	57	2013	-1
Castile-Leon	Soria	Medinaceli-Paridera de Carenas	57	2014	1
Castile-Leon	Soria	Medinaceli-Paridera de Carenas	57	2015	1
Castile-Leon	Soria	Medinaceli-Alto de las Majadas	58	2004	-1
Castile-Leon	Soria	Medinaceli-Alto de las Majadas	58	2005	-1
Castile-Leon	Soria	Medinaceli-Alto de las Majadas	58	2006	-1
Castile-Leon	Soria	Medinaceli-Alto de las Majadas	58	2007	-1
Castile-Leon	Soria	Medinaceli-Alto de las Majadas	58	2008	2
Castile-Leon	Soria	Medinaceli-Alto de las Majadas	58	2009	5
Castile-Leon	Soria	Medinaceli-Alto de las Majadas	58	2010	3
Castile-Leon	Soria	Medinaceli-Alto de las Majadas	58	2011	4
Castile-Leon	Soria	Medinaceli-Alto de las Majadas	58	2012	4
Castile-Leon	Soria	Medinaceli-Alto de las Majadas	58	2013	-1
Castile-Leon	Soria	Medinaceli-Alto de las Majadas	58	2014	2
Castile-Leon	Soria	Medinaceli-Alto de las Majadas	58	2015	0
Castile-Leon	Soria	Medinaceli-Alto de Valdecenteno	59	2004	-1
Castile-Leon	Soria	Medinaceli-Alto de Valdecenteno	59	2005	-1
Castile-Leon	Soria	Medinaceli-Alto de Valdecenteno	59	2006	-1
Castile-Leon	Soria	Medinaceli-Alto de Valdecenteno	59	2007	-1
Castile-Leon	Soria	Medinaceli-Alto de Valdecenteno	59	2008	1
Castile-Leon	Soria	Medinaceli-Alto de Valdecenteno	59	2009	1
Castile-Leon	Soria	Medinaceli-Alto de Valdecenteno	59	2010	1
Castile-Leon	Soria	Medinaceli-Alto de Valdecenteno	59	2011	2
Castile-Leon	Soria	Medinaceli-Alto de Valdecenteno	59	2012	2
Castile-Leon	Soria	Medinaceli-Alto de Valdecenteno	59	2013	-1
Castile-Leon	Soria	Medinaceli-Alto de Valdecenteno	59	2014	1
Castile-Leon	Soria	Medinaceli-Alto de Valdecenteno	59	2015	0
Castile-Leon	Soria	Medinaceli-Conquezuela	60	2004	-1
Castile-Leon	Soria	Medinaceli-Conquezuela	60	2005	-1
Castile-Leon	Soria	Medinaceli-Conquezuela	60	2006	-1
Castile-Leon	Soria	Medinaceli-Conquezuela	60	2007	-1
Castile-Leon	Soria	Medinaceli-Conquezuela	60	2008	-1
Castile-Leon	Soria	Medinaceli-Conquezuela	60	2009	10
Castile-Leon	Soria	Medinaceli-Conquezuela	60	2010	-1
Castile-Leon	Soria	Medinaceli-Conquezuela	60	2011	-1
Castile-Leon	Soria	Medinaceli-Conquezuela	60	2012	-1
Castile-Leon	Soria	Medinaceli-Conquezuela	60	2013	6
Castile-Leon	Soria	Medinaceli-Conquezuela	60	2014	-1
Castile-Leon	Soria	Medinaceli-Conquezuela	60	2015	-1
Castile-Leon	Soria	Medinaceli-Esteras de Medinaceli	61	2004	-1
Castile-Leon	Soria	Medinaceli-Esteras de Medinaceli	61	2005	-1
Castile-Leon	Soria	Medinaceli-Esteras de Medinaceli	61	2006	-1
Castile-Leon	Soria	Medinaceli-Esteras de Medinaceli	61	2007	-1
Castile-Leon	Soria	Medinaceli-Esteras de Medinaceli	61	2008	24
Castile-Leon	Soria	Medinaceli-Esteras de Medinaceli	61	2009	31
Castile-Leon	Soria	Medinaceli-Esteras de Medinaceli	61	2010	10
Castile-Leon	Soria	Medinaceli-Esteras de Medinaceli	61	2011	10
Castile-Leon	Soria	Medinaceli-Esteras de Medinaceli	61	2012	8
Castile-Leon	Soria	Medinaceli-Esteras de Medinaceli	61	2013	6
Castile-Leon	Soria	Medinaceli-Esteras de Medinaceli	61	2014	5
Castile-Leon	Soria	Medinaceli-Esteras de Medinaceli	61	2015	6
Castile-Leon	Soria	Medinaceli-Layna Obetago	62	2004	-1
Castile-Leon	Soria	Medinaceli-Layna Obetago	62	2005	-1
Castile-Leon	Soria	Medinaceli-Layna Obetago	62	2006	13
Castile-Leon	Soria	Medinaceli-Layna Obetago	62	2007	-1
Castile-Leon	Soria	Medinaceli-Layna Obetago	62	2008	12
Castile-Leon	Soria	Medinaceli-Layna Obetago	62	2009	10
Castile-Leon	Soria	Medinaceli-Layna Obetago	62	2010	5
Castile-Leon	Soria	Medinaceli-Layna Obetago	62	2011	2
Castile-Leon	Soria	Medinaceli-Layna Obetago	62	2012	1
Castile-Leon	Soria	Medinaceli-Layna Obetago	62	2013	0
Castile-Leon	Soria	Medinaceli-Layna Obetago	62	2014	0
Castile-Leon	Soria	Medinaceli-Layna Obetago	62	2015	0
Castile-Leon	Soria	Medinaceli-Miño Medinaceli	63	2004	-1
Castile-Leon	Soria	Medinaceli-Miño Medinaceli	63	2005	-1
Castile-Leon	Soria	Medinaceli-Miño Medinaceli	63	2006	9
Castile-Leon	Soria	Medinaceli-Miño Medinaceli	63	2007	-1
Castile-Leon	Soria	Medinaceli-Miño Medinaceli	63	2008	15
Castile-Leon	Soria	Medinaceli-Miño Medinaceli	63	2009	12
Castile-Leon	Soria	Medinaceli-Miño Medinaceli	63	2010	5
Castile-Leon	Soria	Medinaceli-Miño Medinaceli	63	2011	7
Castile-Leon	Soria	Medinaceli-Miño Medinaceli	63	2012	3
Castile-Leon	Soria	Medinaceli-Miño Medinaceli	63	2013	7
Castile-Leon	Soria	Medinaceli-Miño Medinaceli	63	2014	4
Castile-Leon	Soria	Medinaceli-Miño Medinaceli	63	2015	3
Castile-Leon	Soria	Medinaceli-Miño Yelo	64	2004	-1
Castile-Leon	Soria	Medinaceli-Miño Yelo	64	2005	-1
Castile-Leon	Soria	Medinaceli-Miño Yelo	64	2006	5
Castile-Leon	Soria	Medinaceli-Miño Yelo	64	2007	-1
Castile-Leon	Soria	Medinaceli-Miño Yelo	64	2008	2
Castile-Leon	Soria	Medinaceli-Miño Yelo	64	2009	2
Castile-Leon	Soria	Medinaceli-Miño Yelo	64	2010	1
Castile-Leon	Soria	Medinaceli-Miño Yelo	64	2011	0
Castile-Leon	Soria	Medinaceli-Miño Yelo	64	2012	0
Castile-Leon	Soria	Medinaceli-Miño Yelo	64	2013	0
Castile-Leon	Soria	Medinaceli-Miño Yelo	64	2014	0
Castile-Leon	Soria	Medinaceli-Miño Yelo	64	2015	0
Castile-Leon	Soria	Medinaceli-Radona	65	2004	-1
Castile-Leon	Soria	Medinaceli-Radona	65	2005	-1
Castile-Leon	Soria	Medinaceli-Radona	65	2006	4
Castile-Leon	Soria	Medinaceli-Radona	65	2007	-1
Castile-Leon	Soria	Medinaceli-Radona	65	2008	13
Castile-Leon	Soria	Medinaceli-Radona	65	2009	10
Castile-Leon	Soria	Medinaceli-Radona	65	2010	2
Castile-Leon	Soria	Medinaceli-Radona	65	2011	1
Castile-Leon	Soria	Medinaceli-Radona	65	2012	1
Castile-Leon	Soria	Medinaceli-Radona	65	2013	1
Castile-Leon	Soria	Medinaceli-Radona	65	2014	0
Castile-Leon	Soria	Medinaceli-Radona	65	2015	0
Castile-Leon	Soria	Medinaceli-Sierra Ministra	66	2004	-1
Castile-Leon	Soria	Medinaceli-Sierra Ministra	66	2005	-1
Castile-Leon	Soria	Medinaceli-Sierra Ministra	66	2006	-1
Castile-Leon	Soria	Medinaceli-Sierra Ministra	66	2007	-1
Castile-Leon	Soria	Medinaceli-Sierra Ministra	66	2008	15
Castile-Leon	Soria	Medinaceli-Sierra Ministra	66	2009	19
Castile-Leon	Soria	Medinaceli-Sierra Ministra	66	2010	11
Castile-Leon	Soria	Medinaceli-Sierra Ministra	66	2011	9
Castile-Leon	Soria	Medinaceli-Sierra Ministra	66	2012	7
Castile-Leon	Soria	Medinaceli-Sierra Ministra	66	2013	4
Castile-Leon	Soria	Medinaceli-Sierra Ministra	66	2014	8
Castile-Leon	Soria	Medinaceli-Sierra Ministra	66	2015	6
Castile-Leon	Soria	Medinaceli-Taroda	67	2004	-1
Castile-Leon	Soria	Medinaceli-Taroda	67	2005	-1
Castile-Leon	Soria	Medinaceli-Taroda	67	2006	5
Castile-Leon	Soria	Medinaceli-Taroda	67	2007	-1
Castile-Leon	Soria	Medinaceli-Taroda	67	2008	7
Castile-Leon	Soria	Medinaceli-Taroda	67	2009	1
Castile-Leon	Soria	Medinaceli-Taroda	67	2010	1
Castile-Leon	Soria	Medinaceli-Taroda	67	2011	-1
Castile-Leon	Soria	Medinaceli-Taroda	67	2012	2
Castile-Leon	Soria	Medinaceli-Taroda	67	2013	2
Castile-Leon	Soria	Medinaceli-Taroda	67	2014	2
Castile-Leon	Soria	Medinaceli-Taroda	67	2015	2
Castile-Leon	Soria	Medinaceli-Yuba	68	2004	-1
Castile-Leon	Soria	Medinaceli-Yuba	68	2005	-1
Castile-Leon	Soria	Medinaceli-Yuba	68	2006	6
Castile-Leon	Soria	Medinaceli-Yuba	68	2007	-1
Castile-Leon	Soria	Medinaceli-Yuba	68	2008	4
Castile-Leon	Soria	Medinaceli-Yuba	68	2009	8
Castile-Leon	Soria	Medinaceli-Yuba	68	2010	7
Castile-Leon	Soria	Medinaceli-Yuba	68	2011	-1
Castile-Leon	Soria	Medinaceli-Yuba	68	2012	7
Castile-Leon	Soria	Medinaceli-Yuba	68	2013	6
Castile-Leon	Soria	Medinaceli-Yuba	68	2014	7
Castile-Leon	Soria	Medinaceli-Yuba	68	2015	6
Aragon	Teruel	Cascante del Rio-Cerro del Villarejo	69	2004	-1
Aragon	Teruel	Cascante del Rio-Cerro del Villarejo	69	2005	-1
Aragon	Teruel	Cascante del Rio-Cerro del Villarejo	69	2006	-1
Aragon	Teruel	Cascante del Rio-Cerro del Villarejo	69	2007	5
Aragon	Teruel	Cascante del Rio-Cerro del Villarejo	69	2008	-1
Aragon	Teruel	Cascante del Rio-Cerro del Villarejo	69	2009	-1
Aragon	Teruel	Cascante del Rio-Cerro del Villarejo	69	2010	-1
Aragon	Teruel	Cascante del Rio-Cerro del Villarejo	69	2011	-1
Aragon	Teruel	Cascante del Rio-Cerro del Villarejo	69	2012	-1
Aragon	Teruel	Cascante del Rio-Cerro del Villarejo	69	2013	-1
Aragon	Teruel	Cascante del Rio-Cerro del Villarejo	69	2014	-1
Aragon	Teruel	Cascante del Rio-Cerro del Villarejo	69	2015	-1
Aragon	Teruel	Teruel-Zona1 (Molinos)	70	2004	-1
Aragon	Teruel	Teruel-Zona1 (Molinos)	70	2005	-1
Aragon	Teruel	Teruel-Zona1 (Molinos)	70	2006	-1
Aragon	Teruel	Teruel-Zona1 (Molinos)	70	2007	11
Aragon	Teruel	Teruel-Zona1 (Molinos)	70	2008	-1
Aragon	Teruel	Teruel-Zona1 (Molinos)	70	2009	-1
Aragon	Teruel	Teruel-Zona1 (Molinos)	70	2010	-1
Aragon	Teruel	Teruel-Zona1 (Molinos)	70	2011	-1
Aragon	Teruel	Teruel-Zona1 (Molinos)	70	2012	-1
Aragon	Teruel	Teruel-Zona1 (Molinos)	70	2013	-1
Aragon	Teruel	Teruel-Zona1 (Molinos)	70	2014	-1
Aragon	Teruel	Teruel-Zona1 (Molinos)	70	2015	5
Aragon	Teruel	Teruel-Zona2 (Molinos)	71	2004	-1
Aragon	Teruel	Teruel-Zona2 (Molinos)	71	2005	-1
Aragon	Teruel	Teruel-Zona2 (Molinos)	71	2006	-1
Aragon	Teruel	Teruel-Zona2 (Molinos)	71	2007	2
Aragon	Teruel	Teruel-Zona2 (Molinos)	71	2008	-1
Aragon	Teruel	Teruel-Zona2 (Molinos)	71	2009	-1
Aragon	Teruel	Teruel-Zona2 (Molinos)	71	2010	-1
Aragon	Teruel	Teruel-Zona2 (Molinos)	71	2011	-1
Aragon	Teruel	Teruel-Zona2 (Molinos)	71	2012	-1
Aragon	Teruel	Teruel-Zona2 (Molinos)	71	2013	-1
Aragon	Teruel	Teruel-Zona2 (Molinos)	71	2014	-1
Aragon	Teruel	Teruel-Zona2 (Molinos)	71	2015	7
Aragon	Teruel	Teruel-Zona3 (Molinos)	72	2004	-1
Aragon	Teruel	Teruel-Zona3 (Molinos)	72	2005	-1
Aragon	Teruel	Teruel-Zona3 (Molinos)	72	2006	-1
Aragon	Teruel	Teruel-Zona3 (Molinos)	72	2007	2
Aragon	Teruel	Teruel-Zona3 (Molinos)	72	2008	-1
Aragon	Teruel	Teruel-Zona3 (Molinos)	72	2009	-1
Aragon	Teruel	Teruel-Zona3 (Molinos)	72	2010	-1
Aragon	Teruel	Teruel-Zona3 (Molinos)	72	2011	-1
Aragon	Teruel	Teruel-Zona3 (Molinos)	72	2012	-1
Aragon	Teruel	Teruel-Zona3 (Molinos)	72	2013	-1
Aragon	Teruel	Teruel-Zona3 (Molinos)	72	2014	-1
Aragon	Teruel	Teruel-Zona3 (Molinos)	72	2015	6
Aragon	Teruel	Teruel-Zona4 (Molinos)	73	2004	-1
Aragon	Teruel	Teruel-Zona4 (Molinos)	73	2005	-1
Aragon	Teruel	Teruel-Zona4 (Molinos)	73	2006	-1
Aragon	Teruel	Teruel-Zona4 (Molinos)	73	2007	8
Aragon	Teruel	Teruel-Zona4 (Molinos)	73	2008	-1
Aragon	Teruel	Teruel-Zona4 (Molinos)	73	2009	-1
Aragon	Teruel	Teruel-Zona4 (Molinos)	73	2010	-1
Aragon	Teruel	Teruel-Zona4 (Molinos)	73	2011	-1
Aragon	Teruel	Teruel-Zona4 (Molinos)	73	2012	-1
Aragon	Teruel	Teruel-Zona4 (Molinos)	73	2013	-1
Aragon	Teruel	Teruel-Zona4 (Molinos)	73	2014	-1
Aragon	Teruel	Teruel-Zona4 (Molinos)	73	2015	5
Aragon	Teruel	Teruel-Zona5 (Hoya de Ejulve)	74	2004	-1
Aragon	Teruel	Teruel-Zona5 (Hoya de Ejulve)	74	2005	-1
Aragon	Teruel	Teruel-Zona5 (Hoya de Ejulve)	74	2006	-1
Aragon	Teruel	Teruel-Zona5 (Hoya de Ejulve)	74	2007	7
Aragon	Teruel	Teruel-Zona5 (Hoya de Ejulve)	74	2008	-1
Aragon	Teruel	Teruel-Zona5 (Hoya de Ejulve)	74	2009	-1
Aragon	Teruel	Teruel-Zona5 (Hoya de Ejulve)	74	2010	-1
Aragon	Teruel	Teruel-Zona5 (Hoya de Ejulve)	74	2011	-1
Aragon	Teruel	Teruel-Zona5 (Hoya de Ejulve)	74	2012	-1
Aragon	Teruel	Teruel-Zona5 (Hoya de Ejulve)	74	2013	-1
Aragon	Teruel	Teruel-Zona5 (Hoya de Ejulve)	74	2014	-1
Aragon	Teruel	Teruel-Zona5 (Hoya de Ejulve)	74	2015	5
Castile-La Mancha	Toledo	Vega de Quero	75	2004	2
Castile-La Mancha	Toledo	Vega de Quero	75	2005	-1
Castile-La Mancha	Toledo	Vega de Quero	75	2006	-1
Castile-La Mancha	Toledo	Vega de Quero	75	2007	2
Castile-La Mancha	Toledo	Vega de Quero	75	2008	-1
Castile-La Mancha	Toledo	Vega de Quero	75	2009	-1
Castile-La Mancha	Toledo	Vega de Quero	75	2010	-1
Castile-La Mancha	Toledo	Vega de Quero	75	2011	-1
Castile-La Mancha	Toledo	Vega de Quero	75	2012	-1
Castile-La Mancha	Toledo	Vega de Quero	75	2013	2
Castile-La Mancha	Toledo	Vega de Quero	75	2014	-1
Castile-La Mancha	Toledo	Vega de Quero	75	2015	-1
Community of Valencia	Valencia	Ademuz-Hontanar	76	2004	11
Community of Valencia	Valencia	Ademuz-Hontanar	76	2005	-1
Community of Valencia	Valencia	Ademuz-Hontanar	76	2006	-1
Community of Valencia	Valencia	Ademuz-Hontanar	76	2007	36
Community of Valencia	Valencia	Ademuz-Hontanar	76	2008	-1
Community of Valencia	Valencia	Ademuz-Hontanar	76	2009	-1
Community of Valencia	Valencia	Ademuz-Hontanar	76	2010	-1
Community of Valencia	Valencia	Ademuz-Hontanar	76	2011	11
Community of Valencia	Valencia	Ademuz-Hontanar	76	2012	16
Community of Valencia	Valencia	Ademuz-Hontanar	76	2013	12
Community of Valencia	Valencia	Ademuz-Hontanar	76	2014	14
Community of Valencia	Valencia	Ademuz-Hontanar	76	2015	13
Community of Valencia	Valencia	Ademuz-Tovedas	77	2004	1
Community of Valencia	Valencia	Ademuz-Tovedas	77	2005	-1
Community of Valencia	Valencia	Ademuz-Tovedas	77	2006	-1
Community of Valencia	Valencia	Ademuz-Tovedas	77	2007	4
Community of Valencia	Valencia	Ademuz-Tovedas	77	2008	-1
Community of Valencia	Valencia	Ademuz-Tovedas	77	2009	-1
Community of Valencia	Valencia	Ademuz-Tovedas	77	2010	-1
Community of Valencia	Valencia	Ademuz-Tovedas	77	2011	0
Community of Valencia	Valencia	Ademuz-Tovedas	77	2012	0
Community of Valencia	Valencia	Ademuz-Tovedas	77	2013	0
Community of Valencia	Valencia	Ademuz-Tovedas	77	2014	0
Community of Valencia	Valencia	Ademuz-Tovedas	77	2015	0
Community of Valencia	Valencia	Ademuz-Losar1	78	2004	-1
Community of Valencia	Valencia	Ademuz-Losar1	78	2005	-1
Community of Valencia	Valencia	Ademuz-Losar1	78	2006	13
Community of Valencia	Valencia	Ademuz-Losar1	78	2007	25
Community of Valencia	Valencia	Ademuz-Losar1	78	2008	-1
Community of Valencia	Valencia	Ademuz-Losar1	78	2009	-1
Community of Valencia	Valencia	Ademuz-Losar1	78	2010	-1
Community of Valencia	Valencia	Ademuz-Losar1	78	2011	12
Community of Valencia	Valencia	Ademuz-Losar1	78	2012	20
Community of Valencia	Valencia	Ademuz-Losar1	78	2013	19
Community of Valencia	Valencia	Ademuz-Losar1	78	2014	18
Community of Valencia	Valencia	Ademuz-Losar1	78	2015	20
Community of Valencia	Valencia	Ademuz-Losar3	79	2004	-1
Community of Valencia	Valencia	Ademuz-Losar3	79	2005	-1
Community of Valencia	Valencia	Ademuz-Losar3	79	2006	-1
Community of Valencia	Valencia	Ademuz-Losar3	79	2007	4
Community of Valencia	Valencia	Ademuz-Losar3	79	2008	-1
Community of Valencia	Valencia	Ademuz-Losar3	79	2009	-1
Community of Valencia	Valencia	Ademuz-Losar3	79	2010	-1
Community of Valencia	Valencia	Ademuz-Losar3	79	2011	7
Community of Valencia	Valencia	Ademuz-Losar3	79	2012	2
Community of Valencia	Valencia	Ademuz-Losar3	79	2013	6
Community of Valencia	Valencia	Ademuz-Losar3	79	2014	6
Community of Valencia	Valencia	Ademuz-Losar3	79	2015	5
Community of Valencia	Valencia	Ademuz-Cerrillo1	80	2004	-1
Community of Valencia	Valencia	Ademuz-Cerrillo1	80	2005	-1
Community of Valencia	Valencia	Ademuz-Cerrillo1	80	2006	-1
Community of Valencia	Valencia	Ademuz-Cerrillo1	80	2007	9
Community of Valencia	Valencia	Ademuz-Cerrillo1	80	2008	-1
Community of Valencia	Valencia	Ademuz-Cerrillo1	80	2009	-1
Community of Valencia	Valencia	Ademuz-Cerrillo1	80	2010	-1
Community of Valencia	Valencia	Ademuz-Cerrillo1	80	2011	1
Community of Valencia	Valencia	Ademuz-Cerrillo1	80	2012	2
Community of Valencia	Valencia	Ademuz-Cerrillo1	80	2013	3
Community of Valencia	Valencia	Ademuz-Cerrillo1	80	2014	3
Community of Valencia	Valencia	Ademuz-Cerrillo1	80	2015	4
Community of Valencia	Valencia	Ademuz-Pinar1	81	2004	20
Community of Valencia	Valencia	Ademuz-Pinar1	81	2005	-1
Community of Valencia	Valencia	Ademuz-Pinar1	81	2006	-1
Community of Valencia	Valencia	Ademuz-Pinar1	81	2007	17
Community of Valencia	Valencia	Ademuz-Pinar1	81	2008	-1
Community of Valencia	Valencia	Ademuz-Pinar1	81	2009	-1
Community of Valencia	Valencia	Ademuz-Pinar1	81	2010	-1
Community of Valencia	Valencia	Ademuz-Pinar1	81	2011	13
Community of Valencia	Valencia	Ademuz-Pinar1	81	2012	16
Community of Valencia	Valencia	Ademuz-Pinar1	81	2013	14
Community of Valencia	Valencia	Ademuz-Pinar1	81	2014	11
Community of Valencia	Valencia	Ademuz-Pinar1	81	2015	9
Community of Valencia	Valencia	Ademuz-Pinar2	82	2004	2
Community of Valencia	Valencia	Ademuz-Pinar2	82	2005	-1
Community of Valencia	Valencia	Ademuz-Pinar2	82	2006	-1
Community of Valencia	Valencia	Ademuz-Pinar2	82	2007	3
Community of Valencia	Valencia	Ademuz-Pinar2	82	2008	-1
Community of Valencia	Valencia	Ademuz-Pinar2	82	2009	-1
Community of Valencia	Valencia	Ademuz-Pinar2	82	2010	-1
Community of Valencia	Valencia	Ademuz-Pinar2	82	2011	0
Community of Valencia	Valencia	Ademuz-Pinar2	82	2012	0
Community of Valencia	Valencia	Ademuz-Pinar2	82	2013	0
Community of Valencia	Valencia	Ademuz-Pinar2	82	2014	0
Community of Valencia	Valencia	Ademuz-Pinar2	82	2015	0
Community of Valencia	Valencia	Ademuz-Pinar3	83	2004	5
Community of Valencia	Valencia	Ademuz-Pinar3	83	2005	-1
Community of Valencia	Valencia	Ademuz-Pinar3	83	2006	-1
Community of Valencia	Valencia	Ademuz-Pinar3	83	2007	-1
Community of Valencia	Valencia	Ademuz-Pinar3	83	2008	-1
Community of Valencia	Valencia	Ademuz-Pinar3	83	2009	-1
Community of Valencia	Valencia	Ademuz-Pinar3	83	2010	-1
Community of Valencia	Valencia	Ademuz-Pinar3	83	2011	0
Community of Valencia	Valencia	Ademuz-Pinar3	83	2012	0
Community of Valencia	Valencia	Ademuz-Pinar3	83	2013	0
Community of Valencia	Valencia	Ademuz-Pinar3	83	2014	0
Community of Valencia	Valencia	Ademuz-Pinar3	83	2015	0
Castile-Leon	Zamora	Almaraz de Duero	84	2004	-1
Castile-Leon	Zamora	Almaraz de Duero	84	2005	18
Castile-Leon	Zamora	Almaraz de Duero	84	2006	-1
Castile-Leon	Zamora	Almaraz de Duero	84	2007	-1
Castile-Leon	Zamora	Almaraz de Duero	84	2008	17
Castile-Leon	Zamora	Almaraz de Duero	84	2009	-1
Castile-Leon	Zamora	Almaraz de Duero	84	2010	-1
Castile-Leon	Zamora	Almaraz de Duero	84	2011	-1
Castile-Leon	Zamora	Almaraz de Duero	84	2012	-1
Castile-Leon	Zamora	Almaraz de Duero	84	2013	-1
Castile-Leon	Zamora	Almaraz de Duero	84	2014	-1
Castile-Leon	Zamora	Almaraz de Duero	84	2015	-1
Castile-Leon	Zamora	Arribes del Duero-Cozcurrita	85	2004	-1
Castile-Leon	Zamora	Arribes del Duero-Cozcurrita	85	2005	1
Castile-Leon	Zamora	Arribes del Duero-Cozcurrita	85	2006	-1
Castile-Leon	Zamora	Arribes del Duero-Cozcurrita	85	2007	-1
Castile-Leon	Zamora	Arribes del Duero-Cozcurrita	85	2008	3
Castile-Leon	Zamora	Arribes del Duero-Cozcurrita	85	2009	-1
Castile-Leon	Zamora	Arribes del Duero-Cozcurrita	85	2010	-1
Castile-Leon	Zamora	Arribes del Duero-Cozcurrita	85	2011	-1
Castile-Leon	Zamora	Arribes del Duero-Cozcurrita	85	2012	-1
Castile-Leon	Zamora	Arribes del Duero-Cozcurrita	85	2013	-1
Castile-Leon	Zamora	Arribes del Duero-Cozcurrita	85	2014	-1
Castile-Leon	Zamora	Arribes del Duero-Cozcurrita	85	2015	-1
Castile-Leon	Zamora	Carbajales de Alba-Sierra de Contadores	86	2004	-1
Castile-Leon	Zamora	Carbajales de Alba-Sierra de Contadores	86	2005	4
Castile-Leon	Zamora	Carbajales de Alba-Sierra de Contadores	86	2006	-1
Castile-Leon	Zamora	Carbajales de Alba-Sierra de Contadores	86	2007	-1
Castile-Leon	Zamora	Carbajales de Alba-Sierra de Contadores	86	2008	1
Castile-Leon	Zamora	Carbajales de Alba-Sierra de Contadores	86	2009	-1
Castile-Leon	Zamora	Carbajales de Alba-Sierra de Contadores	86	2010	-1
Castile-Leon	Zamora	Carbajales de Alba-Sierra de Contadores	86	2011	-1
Castile-Leon	Zamora	Carbajales de Alba-Sierra de Contadores	86	2012	-1
Castile-Leon	Zamora	Carbajales de Alba-Sierra de Contadores	86	2013	-1
Castile-Leon	Zamora	Carbajales de Alba-Sierra de Contadores	86	2014	-1
Castile-Leon	Zamora	Carbajales de Alba-Sierra de Contadores	86	2015	-1
Castile-Leon	Zamora	Donadillo	87	2004	-1
Castile-Leon	Zamora	Donadillo	87	2005	1
Castile-Leon	Zamora	Donadillo	87	2006	-1
Castile-Leon	Zamora	Donadillo	87	2007	-1
Castile-Leon	Zamora	Donadillo	87	2008	0
Castile-Leon	Zamora	Donadillo	87	2009	-1
Castile-Leon	Zamora	Donadillo	87	2010	-1
Castile-Leon	Zamora	Donadillo	87	2011	-1
Castile-Leon	Zamora	Donadillo	87	2012	-1
Castile-Leon	Zamora	Donadillo	87	2013	-1
Castile-Leon	Zamora	Donadillo	87	2014	-1
Castile-Leon	Zamora	Donadillo	87	2015	-1
Castile-Leon	Zamora	Tabara-La Jareta	88	2004	-1
Castile-Leon	Zamora	Tabara-La Jareta	88	2005	11
Castile-Leon	Zamora	Tabara-La Jareta	88	2006	-1
Castile-Leon	Zamora	Tabara-La Jareta	88	2007	-1
Castile-Leon	Zamora	Tabara-La Jareta	88	2008	10
Castile-Leon	Zamora	Tabara-La Jareta	88	2009	-1
Castile-Leon	Zamora	Tabara-La Jareta	88	2010	-1
Castile-Leon	Zamora	Tabara-La Jareta	88	2011	-1
Castile-Leon	Zamora	Tabara-La Jareta	88	2012	-1
Castile-Leon	Zamora	Tabara-La Jareta	88	2013	-1
Castile-Leon	Zamora	Tabara-La Jareta	88	2014	-1
Castile-Leon	Zamora	Tabara-La Jareta	88	2015	-1
Castile-Leon	Zamora	Vegalatrave-Losacio	89	2004	-1
Castile-Leon	Zamora	Vegalatrave-Losacio	89	2005	1
Castile-Leon	Zamora	Vegalatrave-Losacio	89	2006	-1
Castile-Leon	Zamora	Vegalatrave-Losacio	89	2007	-1
Castile-Leon	Zamora	Vegalatrave-Losacio	89	2008	1
Castile-Leon	Zamora	Vegalatrave-Losacio	89	2009	-1
Castile-Leon	Zamora	Vegalatrave-Losacio	89	2010	-1
Castile-Leon	Zamora	Vegalatrave-Losacio	89	2011	-1
Castile-Leon	Zamora	Vegalatrave-Losacio	89	2012	-1
Castile-Leon	Zamora	Vegalatrave-Losacio	89	2013	-1
Castile-Leon	Zamora	Vegalatrave-Losacio	89	2014	-1
Castile-Leon	Zamora	Vegalatrave-Losacio	89	2015	-1
Aragon	Zaragoza	Belchite-La Lomaza	90	2004	-1
Aragon	Zaragoza	Belchite-La Lomaza	90	2005	38
Aragon	Zaragoza	Belchite-La Lomaza	90	2006	-1
Aragon	Zaragoza	Belchite-La Lomaza	90	2007	-1
Aragon	Zaragoza	Belchite-La Lomaza	90	2008	-1
Aragon	Zaragoza	Belchite-La Lomaza	90	2009	46
Aragon	Zaragoza	Belchite-La Lomaza	90	2010	-1
Aragon	Zaragoza	Belchite-La Lomaza	90	2011	-1
Aragon	Zaragoza	Belchite-La Lomaza	90	2012	45
Aragon	Zaragoza	Belchite-La Lomaza	90	2013	-1
Aragon	Zaragoza	Belchite-La Lomaza	90	2014	-1
Aragon	Zaragoza	Belchite-La Lomaza	90	2015	-1
Aragon	Zaragoza	Osera-Saso	91	2004	-1
Aragon	Zaragoza	Osera-Saso	91	2005	-1
Aragon	Zaragoza	Osera-Saso	91	2006	7
Aragon	Zaragoza	Osera-Saso	91	2007	-1
Aragon	Zaragoza	Osera-Saso	91	2008	-1
Aragon	Zaragoza	Osera-Saso	91	2009	-1
Aragon	Zaragoza	Osera-Saso	91	2010	-1
Aragon	Zaragoza	Osera-Saso	91	2011	-1
Aragon	Zaragoza	Osera-Saso	91	2012	-1
Aragon	Zaragoza	Osera-Saso	91	2013	-1
Aragon	Zaragoza	Osera-Saso	91	2014	-1
Aragon	Zaragoza	Osera-Saso	91	2015	-1
Aragon	Zaragoza	Rueda de Jalon	92	2004	-1
Aragon	Zaragoza	Rueda de Jalon	92	2005	-1
Aragon	Zaragoza	Rueda de Jalon	92	2006	-1
Aragon	Zaragoza	Rueda de Jalon	92	2007	2
Aragon	Zaragoza	Rueda de Jalon	92	2008	-1
Aragon	Zaragoza	Rueda de Jalon	92	2009	-1
Aragon	Zaragoza	Rueda de Jalon	92	2010	-1
Aragon	Zaragoza	Rueda de Jalon	92	2011	-1
Aragon	Zaragoza	Rueda de Jalon	92	2012	-1
Aragon	Zaragoza	Rueda de Jalon	92	2013	-1
Aragon	Zaragoza	Rueda de Jalon	92	2014	-1
Aragon	Zaragoza	Rueda de Jalon	92	2015	-1
